# Supplementary material
Source: MDPI journal article supplement (https://www.mdpi.com/2311-5637/4/3/72)
Supplement: s1 [file s1]

## Supplemental Information

### Computing the Composition of Ethanol-Water Mixtures Based on Experimental Density and Temperature Measurements

Brooks B. Danahy, David L. Minnick, and Mark B. Shiflett\*

Department of Chemical & Petroleum Engineering and Center for Environmentally Beneficial Catalysis, University of Kansas, Lawrence, KS 66045, USA. Phone: +1 (785) 864-4947; Fax: +1 (785) 864-4967; e-mail

#### Supplemental Figure S1:

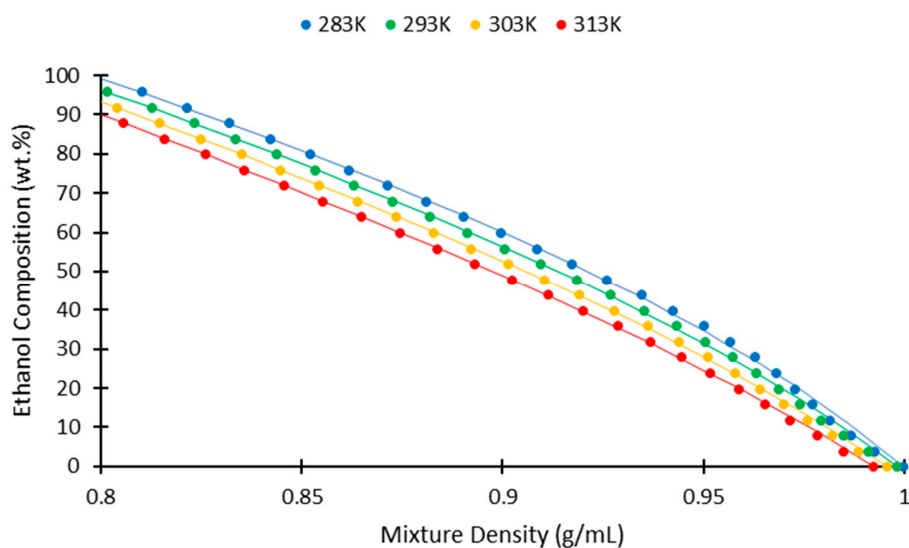

Figure S1: Global comparison of the Redlich-Kister model fit to literature density data between 0-100 wt.% ethanol. Data points represent published data and trend lines represent model fit.
